# Supplementary material for: Financial Inclusion and Natural Disasters
Source: Royal Society of Chemistry journal article supplement (doi:10.1039/d3fo04152b), 2013-01-01
Supplement: d3fo04152b9.xlsx [file d3fo04152b9.xlsx]

## Sheet: Figure 1
Items	Casein						Hydrolyzed Casein								Casein							Hydrolyzed Casein
Stem cell-Lgr5	1.19	0.919	1.177	1.285	0.812	0.744	1.518	0.834	1.41	0.657	0.901	0.686		Ghrelin	553.656	707.854	496.582	547.25	454.861	468.999	428.73	917.634	816.797	847.514	681.116	755.679	541.4	723.037
Tuft cell-Dclk1	0.363	1.337	1.866	1.231	1.277	0.703	2.037	2.075	2.435	1.841	1.488	0.909
Paneth cell-Lyz1	1.305	0.598	0.797	2.115	1.373	0.553	1.364	1.408	1.941	1.287	0.741	1.083			Casein										Hydrolyzed Casein
Goblet cell-Muc2	0.91	1.297	0.61	1.576	1.212	0.727	1.569	1.041	1.226	0.976	0.786	0.588		X/A cell	2	2	1	2	2	2	1	1	2	2	3	3	2	3	1	4	4	2	3	3
Enteronedocrine cell-ChgA	0.721	0.842	1.112	1.029	1.144	1.257	1.65	2.23	3.145	1.397	1.472	1.115
X/A Cell-Ghrelin	1.209	0.929	1.105	1.244	1.179	0.549	2.87	2.417	2.702	3.155	3.484	2.375
K cell-GIP	1.106	1.209	1.221	1.131	0.837	0.648	1.584	1.562	2.048	1.493	1.12	1.011
L cell-Gcg	0.887	1.028	0.934	0.902	1.235	1.053	1.169	2.307	2.886	3.311	2.284	1.662
I cell-Cck	1.358	1.189	1.038	1.155	0.841	0.614	1.634	1.468	1.829	1.476	1.183	1.069
EC cell-Tph1	1.029	0.901	1.135	1.178	1.068	0.756	1.599	1.646	1.979	2.091	1.283	1.242
S cell-Sct	0.936	1.337	1.04	1.197	1.129	0.569	1.737	3.361	2.952	3.124	1.494	1.906
D cell-Sst	0.899	1.092	1.216	0.988	1.351	0.628	1.392	2.938	3.447	1.905	1.443	1.233
Notch1		0.9	0.72	1.135	1.367	0.995	0.776	0.707	0.509	0.452	0.524
Hes1	0.739	0.749	1.739	1.034	1.069	0.94	1.047	1.195	0.998	1.752	0.789	0.709
Math1	0.988	0.816	0.96	1.231	1.161	0.905	1.046	1.096	0.86	1.071	1.018	0.91
Ngn3	1.298	0.837	0.931	0.799	1.231	1.004	1.83	1.074	1.898	2.136	1.984	1.029
Nkx2.2	0.427	0.961	1.416	0.675	1.701	1.499	1.029	1.87	1.686	1.293	0.962	0.915
Pax4	1.072	0.599	1.527	1.098	1.02	0.911	1.876	1.362	2.162	1.181	2.01	1.441
Arx	0.822	1.25	0.883	1.247	1.197	0.739	1.396	1.117	0.753	0.736	1.476	0.585
Pax6	0.862	0.577	1.009	1.189	2.035	0.824	1.164	1.8	3.227	1.778	2.35	1.294
NeuroD	0.869	0.747	0.934	1.445	1.164	0.981	1.386	0.919	1.178	0.976	0.819	1.019
Transmission rate	42.03	53.95	47.06	38.03	47.76	55.71	50.75	64.17	66.18	59.77	58.9	50.72
	Casein			Hydrolyzed Casein
CHGA	1.11656	0.944992	0.938453	1.5772	1.6094	1.30597
NGN3	0.961721	1.04383	0.994444	1.6061	1.20048	1.39964

## Sheet: Figure 2
Items	Casein						Hydrolyzed Casein							Ghrelin	Casein								Hydrolyzed Casein
Vehicle	9.23735	8.64398	8.70703	8.75917	9.50272	8.84955	8.73937	8.64474	8.86614	9.30141	9.06153	8.73383		Vehicle	128.595	74.4571	141.716	140.007	130.508	98.2208	167.037	148.113	215.916	177.932	161.571	170.356	181.296	140.709	202.409	199.695
ABX	8.53897		7.10009	8.28697	7.02701	8.21994	7.92577	8.51143	8.02058	8.47392	8.44836			ABX	226.511	180.875	225.413	296.096	325.176	258.006	156.755		213.253	173.627	139.873	200.654	178.09	165.93	177.537
Stem cell-Lgr5	1.719	0.889	0.957	0.67	1.481	0.689	0.679	0.929	0.648	0.887	0.628	0.602			Casein										Hydrolyzed Casein
Tuft cell-Dclk1	1.642	1.237	0.62	1.454	0.728	0.75	1.101	1.341	0.772	1.078	0.472	0.31		ABX X/A Cell	2	1	2	3	1	2	2	3	1	3	1	2	1	1	2	1	1	1	1	1
Paneth cell-Lyz1	1.473	1.632	0.963	1.68	0.704	0.365	0.558	0.825	0.448	0.86	0.52	0.523
Goblet cell-Muc2	1.466	1.203	0.912	0.756	1.168	0.704	0.744	1.113	0.797	1.097	1.175	0.849
EE cell-ChgA	0.764	0.773	0.853	0.881	1.952	1.155	0.909	1.157	0.759	1.051	1.09	0.842
X/A cell-Ghrelin	0.984	1.279	1.087	1.273	1.547	0.742	0.72	1.031	0.799	1.067	0.788	0.901
K cell-GIP	0.981	1.394	0.799	1.32	0.961	0.722	0.871	0.875	0.842	0.832	0.72	0.868
L cell-Gcg	1.116	1.067	0.586	1.133	0.978	1.293	0.775	1.623	0.959	1.064	0.822	1.32
I cell-Cck	1.204	1.167	0.798	1.101	0.902	0.898	0.801	0.991	0.749	0.824	0.786	0.776
EC cell-Tph1	1.28	1.141	1.076	1.19	0.913	0.586	1.132	1.106	0.902	1.068	0.871	1.086
S cell-Sct	0.851	1.378	1.148	1.299	0.967	0.591	1.251	1.602	0.961	1.389	1.196	1.329
D cell-Sst	1.185	1.196	0.836	1.555	0.914	0.594	0.345	1.181	0.743	1.08	1.087	0.78
Notch1	1.164	1.237	1.008	1.067	0.837	0.77	1.352	1.739	0.932	1.151	2.444	1.401
Hes1	1.22	1.125	0.868	1.04	0.764	1.056	1.066	1.266	0.98	0.588	0.659	0.836
Math1	1.426	0.994	0.936	0.87	0.984	0.881	0.735	0.643	0.702	0.818	0.871	0.537
Ngn3	0.932	0.826	1.012	1.038	1.429	0.866	0.816	0.79	0.766	0.921	0.663	0.704
Nkx2.2	1.429	0.953	0.846	1.067	1.048	0.776	1.073	0.843	0.783	0.653	0.904	0.804
Pax4	1.322	0.707	0.791	0.8	1.025	1.651	1.345	1.568	1.209	1.173	1.112	0.844
Arx	1.369	1.101	1.198	0.881	0.838	0.749	1.002	0.647	0.732	0.891	1.063	0.551
Pax6	0.787	0.737	0.868	0.971	0.569		0.713	0.828	0.495	0.509	0.713	0.707
NeuroD	1.654	1.125	1.11	0.878	0.774	0.712	0.989	1.009	0.79	1.024	0.91	0.663
	Casein			Hydrolyzed Casein
NGN3	0.975919	0.924121	1.09996	0.827227	0.525218	0.751101

## Sheet: Figure 3
Genus		Casein	HydrolyzedCasein		The data presented in the study are deposited in the repository of the Sequence Read Archive, with accession number PRJNA1019890
Muribaculaceae_unclassified		23.1491	25.5029
Akkermansia		18.7303	2.2744
Bifidobacterium		2.84174	7.66237
Ileibacterium		4.67207	3.42197
Turicibacter		0.91193	6.68613
Romboutsia		1.26824	6.17185
Clostridiales_vadinBB60_group_unclassified		6.61851	0.13687
Lachnospiraceae_NK4A136_group		3.0291	3.41869
Paramuribaculum		1.7484	4.61028
Dubosiella		1.89927	4.19321
Coriobacteriaceae_UCG-002		0.24026	5.68136
Clostridium_sensu_stricto_1		0.87949	3.06075
Clostridiales_unclassified		1.75208	1.27217
Lachnospiraceae_unclassified		1.95715	0.86963
Lactobacillus		1.58041	1.1142
Alistipes		1.06912	1.62077
Faecalibaculum		1.39263	0.70471
Parasutterella		0.58658	1.48628
Ralstonia		1.08385	0.85904
Bacteroides		0.7889	1.01954
Enterorhabdus		0.93366	0.83867
Parvibacter		1.17779	0.5111
Desulfovibrio		1.08885	0.57618
Clostridium		0.69713	0.75936
Muribaculum		0.48235	0.93089
Ruminiclostridium_9		0.44968	0.69202
Odoribacter		0.48271	0.58351
Brevundimonas		0.95851	0.10446
Allobaculum		0.03819	0.93723
Bilophila		0.69118	0.24801

## Sheet: Figure 4
Items	Casein					Hydrolyzed Casein					Hydrolyzed Casein +AKK							Casein										Hydrolyzed Casein										Hydrolyzed Casein + AKK
Total bacterial	9.84042	10.3897	10.1471	9.58791	9.48986	10.2095	9.24981	9.74164	9.99066	10.1913	9.03508	8.61734	10.3061	9.03032	9.92532		Ghrelin	231.142	198.844	180.722	168.989	173.384	144.779	195.669	182.853	174.337	142.309	243.404	195.448	194.858	197.589	206.018	196.629	202.91	193.825	185.501	190.434	102.763	198.771	200.47	233.233	169.648	196.703	203.206	142.309	113.685	162.555
A. mucinipila	6.60245	7.12113	6.92334	7.01556	7.11089	6.67141	6.39167	6.60369	6.59649	6.66881	7.0983	7.00529	7.78257	7.31421	7.07955
																	X/A cell	1	2	1	1	2	2	2	1	1	1	2	2	3	2	1	1	2	3	2	1	1	2	2	1	1	2	1	1	1	1
EE cell-ChgA	1.656	1.051	0.467	1.087	1.131	1.001	1.389	1.013	1.795	1.601	1.079	0.799	0.963	0.612	1.036
X/Acell-Ghrelin	1.092	1.295	0.997	1.078	0.658	1.222	1.665	1.347	1.643	1.231	1.124	0.971	1.106	1.058	1.437
K cell-GIP	0.936	0.768	1.125	1.403	0.881	0.974	1.26	1.192	1.451	1.134	1.085	0.86	1.008	0.883	1.089
L cell-Gcg	0.957	0.759	0.741	1.164	1.595	0.947	1.544	1.036	1.94	0.961	0.653	0.724	0.861	0.648	1.227
I cell-Cck	1.02	1.082	0.923	1.228	0.799	1.801	1.618	1.267	1.125	1.215	0.682	0.891	0.748	0.908	0.655
EC cell-Tph1	0.829	1.069	0.987	1.276	0.897	0.977	1.05	0.707	1.302	1.041	0.962	1.041	1.1	0.685	1.38
S cell-Sct	0.917	0.882	1.131	1.198	0.913	1.092	1.95	1.269	1.331	1.256	1.081	1.09	1.189	0.886	0.619
D cell-Sst	0.832	1.098	0.976	1.349	0.832	0.894	0.803	0.906	1.007	1.027	0.74	0.88	0.769	0.891	1.011
Notch1	0.915	1.017	0.914	1.156	1.016	0.904	0.907	0.557	0.696	0.787	0.992	0.986	1.045	1.136	1.67
Hes1	0.886	1.153	0.764	1.203	1.064	0.822	1.385	1.146	1.114	1.115	1.218	1.393	1.35	1.263	1.254
Math1	0.832	1.093	0.878	1.327	0.943	1.023	0.988	1.446	1.076	1.334	1.154	0.963	1.499	1.171	1.728
Ngn3	0.875	1.057	1.156	1.091	0.858	1.32	1.271	0.93	1.614	1.199	0.736	0.789	1.093	1.051	0.996
Nkx2.2	0.769	1.063	0.809	1.263	1.196	0.751	0.863	1.075	1.137	1.658	0.953	0.872	1.382	1.242	1.499
Pax4	0.726	1.032	1.099	0.921	1.318	0.831	1.005	1.174	0.901	1.61	0.933	1.213	1.861	1.094	1.55
Arx	1.076	0.807	0.735	1.812	0.865	0.659	2.279	2.106	1.132	0.751	0.74	0.834	2.429	1.082	1.874
Pax6	0.774	1.624	0.91	0.848	1.03	0.399	0.554	0.896	0.734	1.504	0.709	0.793	1.304	0.918	1.226
NeuroD	0.638	1.019	0.987	1.4	1.113	0.85	1.014	1.332	1.146	0.982	0.699	0.933	1.019	0.673	1.254
	Casein			Hydrolyzed Casein			Hydrolyzed Casein +AKK
CHGA	0.811097	0.762232	1.42667	3.16406	2.171	1.91033	0.94798	0.382144	0.41368
NGN3	1.16555	0.968342	0.866105	1.95317	2.18124	1.43347	0.765007	0.908199	1.41308

## Sheet: Figure 5
Items		Control					Akk						Akk+ LY411575							Control
K cell-GIP		0.761	1.049	1.107	1.029	1.161	0.655	0.714	0.682	0.926	0.904	1.043	0.963	0.623	0.991	0.879	0.474	0.537		1	2	1	2	1	1	3	2	1	2	1	3	1	2	1	3	1	1	2	3	1	2	2	1	3	2	2	3	2	2
L cell-Gcg		0.969	0.82	0.997	1.002	1.26	0.827	0.986	1.093	0.905	0.936	1.1	1.517	1.755	2.147	1.758	2.058	1.876		AKK
I cell-Cck		1.132	1.129	0.927	1.047	0.806	0.925	0.762	0.835	0.852	0.719	0.864	1.164	1.275	1.079	1.144	1.166	0.901		1	2	1	2	1	1	3	2	1	2	1	3	1	2	1	3	1	1	2	3	1	2	2	1	3	2	2	3	2	2
EC cell-Tph1		1.105	0.8	1.154	1.334	0.735	0.538	1.47	2.014	1.264	1.484	1.015	0.483	0.596	0.355	0.087	0.321	0.311
S cell-Sct		0.738	1.267	1.018	1.018	1.032	1.491	0.736	0.715	0.68	0.634	0.883	1.324	1.025	1.003	0.713	0.766	0.958
D cell-Sst		1.201	0.953	1.053	0.914	0.907	0.617	0.412	0.532	0.644	0.498	0.464	0.424	0.415	0.521	0.424	0.704	0.677
Notch1		1.266	0.78	1.023	1.074	0.922	1.249	1.766	1.211	1.171	1.491	1.191	0.358	0.5	0.5	0.249	0.165	0.429
Hes1		1.252	0.7	1.069	1.156	0.924	1.792	1.266	1.231	1.502	1.252	1.24	0.433	0.373	0.359	0.371	0.449	0.581
Math1	0.669	1.141	0.854	1.092	0.966	0.972	0.576	0.832	0.896	0.804	0.737	0.866	3.858	4.092	3.658	4.272	4.23	4.927
Ngn3		0.937	0.553	0.996	1.315	1.473	0.863	0.661	0.608	0.483	0.617	0.759	22.144	35.884	20.343	222.583	11.906	8.354
Nkx2.2		0.964	0.814	1.023	0.985	1.266	0.799	1.283	1.096	1.104	1.15	1.391	8.746	10.965	10.422	5.484	7.052	13.014
Pax4		1.218	0.673	0.825	1.085	1.362	1.163	1.405	1.472	1.416	1.368	1.502	2.278	5.079	2.713	1.153	2.156	3.948
Arx		1.34	0.81	0.815	1.153	0.981	0.735	1.13	0.75	1.08	0.903	0.711	1.66	0.872	1.283	2.595	2.441	1.29
Pax6		0.86	0.928	0.796	1.453	1.083	0.757	0.902	0.748	1.073	0.704	0.762	0.646	0.687	0.783	1.241	0.908	0.622
NeuroD1		1.075	0.984	0.835	1.112	1.018	0.931	1.339	1.245	1.251	1.165	1.067	3.678	7.275	5.816	1.541	4.041	6.64
	Control			Akk			Akk+ LY411575
NGN3	0.968672	1.03219	0.999133	0.253057	0.279811	0.247746	0.62865	0.772596	0.660619
NOTCH1	0.808599	1.04475	1.14665	4.49109	5.90885	2.47914	0.992565	1.32067	1.16035
[truncated: 70 more columns]

## Sheet: Figure S1
Items	Casein							Hydrolyzed Casein
Start	21.78	22.56	23.06	23.83	24.13	24.38	24.87	22.05	22.69	23.25	23.85	24.15	24.38	24.99
End	23.47	25.85	26.31	24.79	27.25	27.42	27.83	25.35	24.2	25.2	26.35	25.78	26.48	26.58
Food intake	1.84	2.35	2.58	2.3	2.04	2	2.46	2.09	2.12	2.31	2.4	2.11	2.49	2.09
Small intestine length	34.5	38	34	35.5	33.5	35	37	33.5	36	34	34.3	36.5	34.5	37.8
	Casein						Hydrolyzed Casein
Stem cell-Lgr5	1.178	1.293	1.139	1.028	1.267	0.442	1.594	1.324	1.616	0.599	0.417	1.484
Tuft cell-Dclk1	1.29	1.14	0.98	0.84	0.76	0.8	1.04	1.82		0.64	0.4	1.01
Paneth cell-Lyz1	1.365	0.758	1.09	1.031	1.375	0.625	0.949	1.688	1.345	0.606	0.39	0.949
Goblet cell-Muc2	1.34	1	1.27	1	1.38	0.43	1.76	1	1.17	0.81	0.56	0.88
EE cell-ChgA	1.293	1.116	1.079	0.828	1.266	0.613	1.35	1.332	1.27	0.741	0.521	0.949
Stem cell-Lgr5	0.672	0.917	1.151	0.856	1.296	1.271	1.779	0.657	0.935	0.804	0.563	1.267
Tuft cell-Dclk1	1.693	0.523	1.432	1.204	0.878	0.747	1.527	0.514	0.421	1.21	0.253	0.738
Paneth cell-Lyz1	0.644	1.01	0.878	1.077	1.076	1.513	1.07	0.641	0.596	0.801	0.478	0.249
Goblet cell-Muc2	0.844	1.058	0.607	1.213	1.301	1.169	1.913	1.206	1.393	0.699	0.692	0.358
EE cell-ChgA	0.904	0.943	0.879	1.134	1.022	1.15	1.28	0.763	1.486	0.827	0.821	0.777
X/A cell-Ghrelin	1.511	0.769	1.109	1.157	1.127	0.595	1.637	1.351	1.406	1.443	1.255	0.465
K cell-GIP	0.964	1.22	1.182	0.807	1.024	0.87	1.022	1.071	0.92	1.449	0.503	0.558
L cell-Gcg	1.057	1.354	0.619	1.299	1.069	0.814	1.739	1.951	1.776	3.401	0.957	0.637
I cell-Cck	1.125	1.113	0.98	1.164	0.904	0.774	0.961	1.147	0.989	1.321	0.617	0.383
EC cell-Tph1	1.254	0.966	0.976	1.252	0.945	0.715	1.459	1.421	1.169	0.891	0.435	0.502
S cell-Sct	1.25	0.793	0.986	1.015	0.956	1.054	1.21	1.303	0.829	1.062	0.732	0.477
D cell-Sst	1.111	0.974	1.036	0.838	1.453	0.732	1.252	1.266	0.663	0.959	0.351	0.431
X/A cell-Ghrelin	0.686981	1.20776	1.20629	1.00278	1.46022	0.682339	0.940339	1.05753	1.23958	1.08182	1.1347	1.01151
K cell-GIP	0.381	1.111	1.532	0.914	1.099	1.533	1.988	1.445	1.839	3.467	2.268	1.658
L cell-Gcg	0.821	0.982	0.986	1.253	0.944	1.063	1.316	0.909	1.491	0.898	1.036	0.887
I cell-Cck	0.646	1.042	1.002	1.078	0.856	1.605	1.266	0.829	0.973	0.662	1.19	0.725
EC cell-Tph1	0.887	0.758	1.141	0.947	1.113	1.237	1.146	0.727	1.72	0.972	0.713	0.805
S cell-Sct	0.878	0.989	0.894	0.967	0.931	1.43	1.221	1.489	2.032	1.028	0.724	0.652
D cell-Sst	0.891	0.998	1.072	0.914	1.073	1.071	1.355	0.459	1.382	1.283	0.626	0.765
Hes1	0.745	1.182	1.381	1.134	1.226	0.592	1.246	1.139	1.587	1.097	0.519	1.037
Math1	1.136	1.128	0.773	1.122	1.153	0.78	1.769	1.025	1.406	1.091	0.555	1.217
Ngn3	1.254	0.9	0.701	1.364	1.019	0.91	2.063	1.173	2.384	0.886	0.431	1.42
Nkx2.2	1.19	1.37	1.12	0.64	1.41	0.61	1.28	1.2	1.78	0.13	0.22	1.2
Pax4	1.25	1.15	1.16	0.88	1.07	0.63	1.21	1.43	1.29	0.94	0.28	0.59
Arx	1.054	1.23	1.158	1.282	0.819	0.634	2.081	1.717	1.529	0.927	1.097	1.305
Pax6	1.2	1.2	1	0.8	1.09	0.8	1.41	1.75	0.93	0.75	0.43	0.78
NeuroD	1.28	1.29	0.89	0.94	1.15	0.63	2.24	1.17	1.14	1	0.55	1.18
Hes1	0.745	1.182	1.381	1.134	1.226	0.592	1.246	1.139	1.587	1.097	0.519	1.037
Math1	1.136	1.128	0.773	1.122	1.153	0.78	1.769	1.025	1.406	1.091	0.555	1.217
Ngn3	1.254	0.9	0.701	1.364	1.019	0.91	2.063	1.173	2.384	0.886	0.431	1.42
Nkx2.2	1.19	1.37	1.12	0.64	1.41	0.61	1.28	1.2	1.78	0.13	0.22	1.2
Pax4	1.25	1.15	1.16	0.88	1.07	0.63	1.21	1.43	1.29	0.94	0.28	0.59
Arx	1.054	1.23	1.158	1.282	0.819	0.634	2.081	1.717	1.529	0.927	1.097	1.305
Pax6	1.2	1.2	1	0.8	1.09	0.8	1.41	1.75	0.93	0.75	0.43	0.78
NeuroD	1.28	1.29	0.89	0.94	1.15	0.63	2.24	1.17	1.14	1	0.55	1.18
X/A Cell-Ghrelin	0.738	0.834	1.126	1.77	1.074	0.759	0.826	1.288	0.91		1.454	0.932

## Sheet: Figure S2
Items	Casein								Hydrolyzed Casein
Start	25.29	23.66	23.46	22.98	22.97	22.26	22.26	22.01	25.04	24.03	23.42	23.13	22.96	22.38	22.24	21.93
End	26.02	26.95	25.43	24.05	25.88	26.37	24.09	24.61	26.09	26.5	23.92	25.05	24.94	23.92	23.66	25.21
Start	24.47	24.07	23.39	23.14	22.89	22.46	22.1		24.4	24.2	23.34	23.2	22.54	22.47	22.1
End	25.35	24.92	23.58	23.6	23.81	24.18	22.83		24.49	24.84	23.34	21.02	23.46	23.45	23
Food intake
Vehicle	3.22238	3.36476	3.09191	2.74	3.10429	3.10429	2.76524	2.98429	2.74714	2.84333	2.79714	2.90857	2.79048	2.94143	2.69333	2.79619
ABX	2.84095	2.7881	2.43286	2.60952	2.64	2.58143	2.69476		2.34857	2.42524	2.57476	2.92429	3.13714	2.84095	2.58048

## Sheet: Figure S3
The data presented in the study are deposited in the repository of the Sequence Read Archive, with accession number PRJNA1019890

## Sheet: Figure S4
Items	Casein						Hydrolyzed Casein
Vehicle	6.43599	5.18559	4.13456	4.21666	5.41654	5.97709	4.76909	4.05848	4.71225	4.09427	4.17336	3.94601	Akkermansia
ABX	2.74463		3.12294	2.55217	3.02129	2.97528	3.42155	3.47749	3.80166	3.53492	3.01678
Vehicle	5.72403	6.03409	5.91063	5.59244	6.41792	5.84187	6.46699	5.78529	6.22819	6.24163	6.62265	6.20631	Bifidobacterium
ABX	0						0
Vehicle	9.23735	8.64398	8.70703	8.75917	9.50272	8.84955	8.73937	8.64474	8.86614	9.30141	9.06153	8.73383	Total bacteria
ABX	8.53897		7.10009	8.28697	7.02701	8.21994	7.92577	8.51143	8.02058	8.47392	8.44836

## Sheet: Figure S5
Items	Casein						Hydrolyzed Casein
Vehicle	7.24962	8.21978	7.75216	5.89519	6.82136	8.07789	6.56545	6.73356	6.10638	5.74895	6.56596	6.5135	Akkermansia
ABX	6.00599	5.59523	5.87264	5.85796	6.07351	5.91142	5.87819	6.21221	5.78578	6.20121	6.2143	6.16679
Vehicle	9.1924	9.76013	9.23834	7.73012	8.8091	9.69929	8.71832	10.5899	7.31874	6.99627	9.1398	9.00543	Bifidobacterium
ABX	7.3288	7.24206	6.96468	7.5666	7.35227	7.39163	7.40953	7.60652	7.848	8.31203	7.07893	7.72197
Vehicle	11.0704	11.7817	11.5174	10.1934	10.9624	11.7163	10.7399	12.0536	10.1202	9.81814	10.9456	11.6198	Total bacteria
ABX	9.94978	9.92546	9.82293	10.0485	10.1559	9.96134	10.0174	10.4056	9.86604	10.3886	10.3481	10.2858
Vehicle	8.95444	10.2216	9.62441	7.61204	9.581	10.0377	8.22405	8.42514	5.98543	5.94716	7.1298	8.20655	Akkermansia
ABX	5.46702	6.65565	6.94807	5.93506	8.41296	6.99206	6.06086	5.41816	5.14527	5.99006	7.90747	7.11153
Vehicle	11.0124	11.8118	10.9481	11.0701	10.8674	11.2374	9.81482	11.4128	9.53659	9.70875	9.52866	11.2438	Bifidobacterium
ABX	7.6133	7.52782	8.50008	7.33256	7.05811	8.13785	9.11778	9.54492	9.2704	9.40816	9.23708	9.6375
Vehicle	13.5655	14.9588	13.6483	13.3348	13.5577	13.7982	12.7804	13.9664	12.4871	12.3998	12.8105	13.9865	Total bacteria
ABX	10.0438	9.96993	9.44777	9.79778	10.5955	10.0658	11.1811	11.3075	11.3301	11.7868	11.6098	11.007

[truncated: 2 more sheets: Figure S6, FigureS7]
