# Supplementary material for: A hydrolyzed casein diet promotes Ngn3 controlling enteroendocrine cell differentiation to increase gastrointestinal motility in mice
Source: Royal Society of Chemistry journal article supplement (doi:10.1039/d3fo04152b), 2023-12-28
Supplement: d3fo04152b10.pdf [file d3fo04152b10.pdf]

Table S1 Experimental diet composition and nutrient levels

| Ingredient (%)               | Casein | Hydrolyzed Casein |
|------------------------------|--------|-------------------|
| Casein (89% CP)              | 25.00  |                   |
| Hydrolyzed Casein (89% CP)   |        | 25.00             |
| Sucrose                      | 10.00  | 10.00             |
| Cornstarch                   | 34.75  | 34.75             |
| Dextrinized cornstarch       | 13.20  | 13.20             |
| Cellulose                    | 5.00   | 5.00              |
| Soybean oil                  | 7.00   | 7.00              |
| Choline chloride             | 0.25   | 0.25              |
| L-Cystine                    | 0.30   | 0.30              |
| <sup>1</sup> Mineral mix     | 3.50   | 3.50              |
| <sup>2</sup> Vitamin mix     | 1.00   | 1.00              |
| Total                        | 100.00 | 100.00            |
| Nutritional level            |        |                   |
| <sup>3</sup> Energy (Kcal/g) | 3.89   | 3.89              |
| Total protein (%)            | 22.25  | 22.25             |
| Total fat (%)                | 7.00   | 7.00              |
| Total carbohydrate (%)       | 57.95  | 57.95             |
| Fiber (%)                    | 5.00   | 5.00              |

<sup>1</sup> Mineral mixture (per kg diet): Ca 5 g; P 1.5 g; K 3.6 g; Mg 0.5 g; Fe 45 mg; Cu 6.0 mg; Mn 10.0 mg; Zn 36.6 mg; I 0.2 mg; Na 1g; Se 0.18mg; chlorine 1.6 g; fluorine 1 mg; chromium 1 mg; molybdenum 0.15 mg.

<sup>2</sup> Vitamin mix (per kg diet): vitamin A 4000 IU; vitamin D<sub>3</sub> 1000 IU; vitamin K<sub>3</sub> 0.09 mg; vitamin B<sub>12</sub> 25 µg; vitamin B<sub>6</sub> 6 mg; riboflavin 6 mg; biotin 0.2 mg; folic acid 2.0 mg; nicotinamide 30 mg; D-pantothenic acid 15 mg.

<sup>3</sup> The energy of diets was calculated based on the contents of protein, fat and carbohydrate.
