# Supplementary material for: A hydrolyzed casein diet promotes Ngn3 controlling enteroendocrine cell differentiation to increase gastrointestinal motility in mice
Source: Royal Society of Chemistry journal article supplement (doi:10.1039/d3fo04152b), 2023-12-28
Supplement: d3fo04152b11.pdf [file d3fo04152b11.pdf]

**Table S2** List of primers used in the present study

| Primers        | Primer sequences (5'-3')    | Product size (bp) |
|----------------|-----------------------------|-------------------|
| $\beta$ -actin | F: GTGACGTTGACATCCGTAAGA    | 245               |
|                | R: GCCGGACTCATCGTACTCC      |                   |
| Ghrelin        | F: AAAGGAATCCAAGAAGCCACC    | 90                |
|                | R: GCCTCTTCTGCTTGTCCTCTGT   |                   |
| GIP            | F: GAGTTCCGATCCCATGCTAA     | 239               |
|                | R: TGTGCCTCTTTGTCCTCCTT     |                   |
| GCG            | F: CGTGCCCAAGATTTTGTGCA     | 96                |
|                | R: CCCTTCAGCATGCCTCTCAA     |                   |
| Cck            | F: GCACTGCTAGCGGATAACATC    | 82                |
|                | R: CCAGGCTCTGCAGGTTCTTAAG   |                   |
| Tph1           | F: GGCTTGCTTTCTTCCATCAG     | 471               |
|                | R: ATGGAGAGAGGCGAGAGACA     |                   |
| Sct            | F: AAGACACTCAGACGGAATGT     | 292               |
|                | R: TGGTTGTTTCAGTCCACTCT     |                   |
| Sst            | F: GCCCAACCAGACAGAGAATGA    | 107               |
|                | R: CTGGGTTCGAGTTGGCAGAC     |                   |
| Ngn3           | F: CACGAAGTGCTCAGTTCCAATTCC | 224               |
|                | R: GAGTTGAGGTTGTGCATGCGATTG |                   |
| Lyz1           | F: AGGAATGGAATGGATGGCTA     | 110               |
|                | R: CGGTCTCCACGTTGTAGTT      |                   |
| Lgr5           | F: CCTTCACAGCCTCAAAGTG      | 95                |
|                | R: GCAGGGATTGAAGGCTTCTC     |                   |
| Muc2           | F: ACGATGCCTACACCAAGGTC     | 210               |
|                | R: TGATCTTCTGCATGTTCCCA     |                   |
| ChgA           | F: CTTTCCAGAGCCTAACCAAGAG   | 200               |
|                | R: CCTCCTCTTCTTTCTCCTCTTG   |                   |
| Nkx2.2         | F: ACCAACACAAAGACGGGGTT     | 257               |

|                        |                            |     |
|------------------------|----------------------------|-----|
|                        | R: CCGTGCAGGGAGTATTGGAG    |     |
| Pax4                   | F: CAGGAATCGGACTATCTTCTCC  | 148 |
|                        | R: GTTAGAAAACCAAACCCCTCACC |     |
| Pax6                   | F: CGGAGTTATGATACCTACACCC  | 155 |
|                        | R: CAGTACTGAGACATGTCAGGTT  |     |
| NeuroD1                | F: GCTCCAGGGTTATGAGATCGT   | 131 |
|                        | R: CATCTGTCCAGCTTGGGGGA    |     |
| Dclk1                  | F: AGCCTCCACCAGCTCAGTTA    | 195 |
|                        | R: CCATACACATCGCTCCATTG    |     |
| Math1                  | F: GCCAGCACCTCCTCTAACAC    | 100 |
|                        | R: GGTCCCCCAACTCTTTTACC    |     |
| Hes1                   | F: ACACCGGACAAACCAAAGAC    | 148 |
|                        | R: AATGCCGGGAGCTATCTTTC    |     |
| Arx                    | F: CACCAGTTACCAGCTGGAGG    | 127 |
|                        | R: CTGGAACCACACCTGGACTC    |     |
| Notch1                 | F: CGTGGATTCATCTGTAGGTGC   | 134 |
|                        | R: CATAGGCAGGTGGGACTACG    |     |
| <i>Akkermansia</i>     | F: CAGCACGTGAAGGTGGGAC     | 328 |
|                        | R: CCTTGCGGTTGGCTTCAGAT    |     |
| <i>Bifidobacterium</i> | F: TCGCGTCYGGTGTGAAAG      | 128 |
|                        | R: GGTGTTCTTCCCGATATCTACA  |     |
| Total bacteria         | F: GTGSTGCAYGGYYGTCGTCA    | 123 |
|                        | R: ACGTCRTCCMCNCCTTCCTC    |     |

---
