# Supplementary material for: A hydrolyzed casein diet promotes Ngn3 controlling enteroendocrine cell differentiation to increase gastrointestinal motility in mice
Source: Royal Society of Chemistry journal article supplement (doi:10.1039/d3fo04152b), 2023-12-28
Supplement: d3fo04152b12.pdf [file d3fo04152b12.pdf]

### 3-Color Prestained Protein Standards

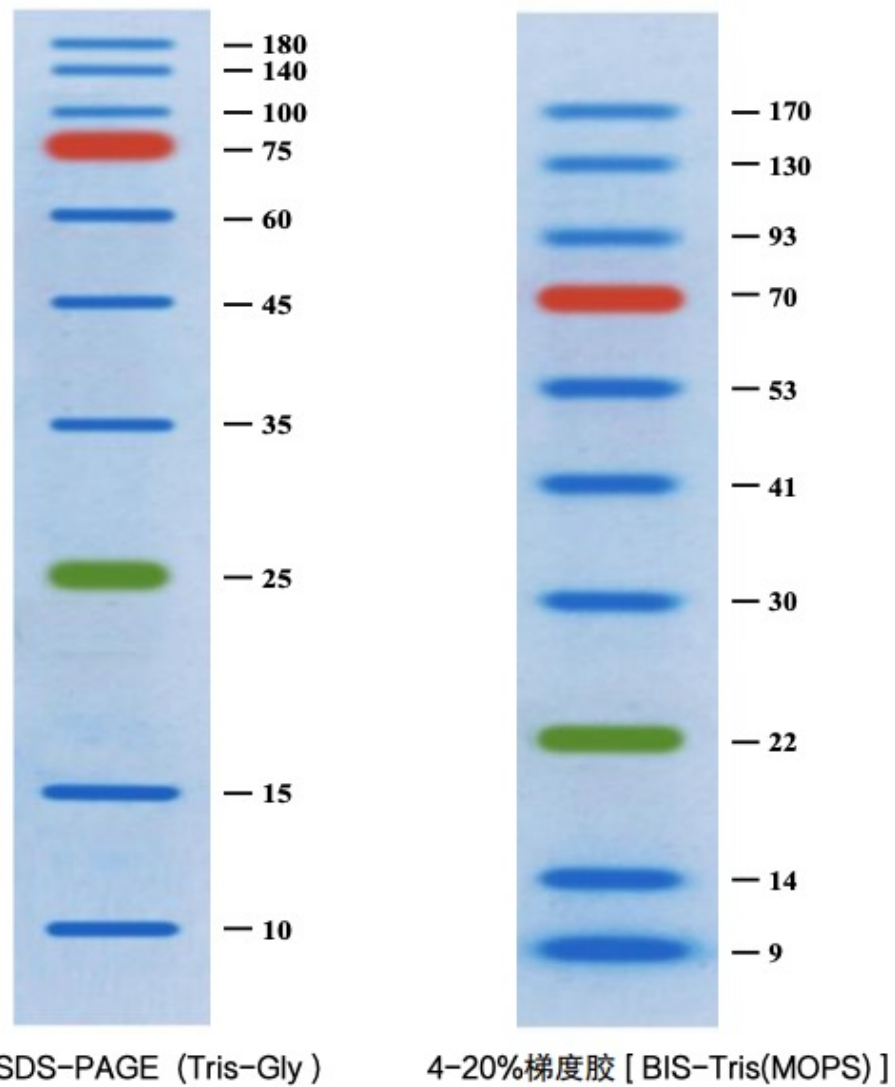

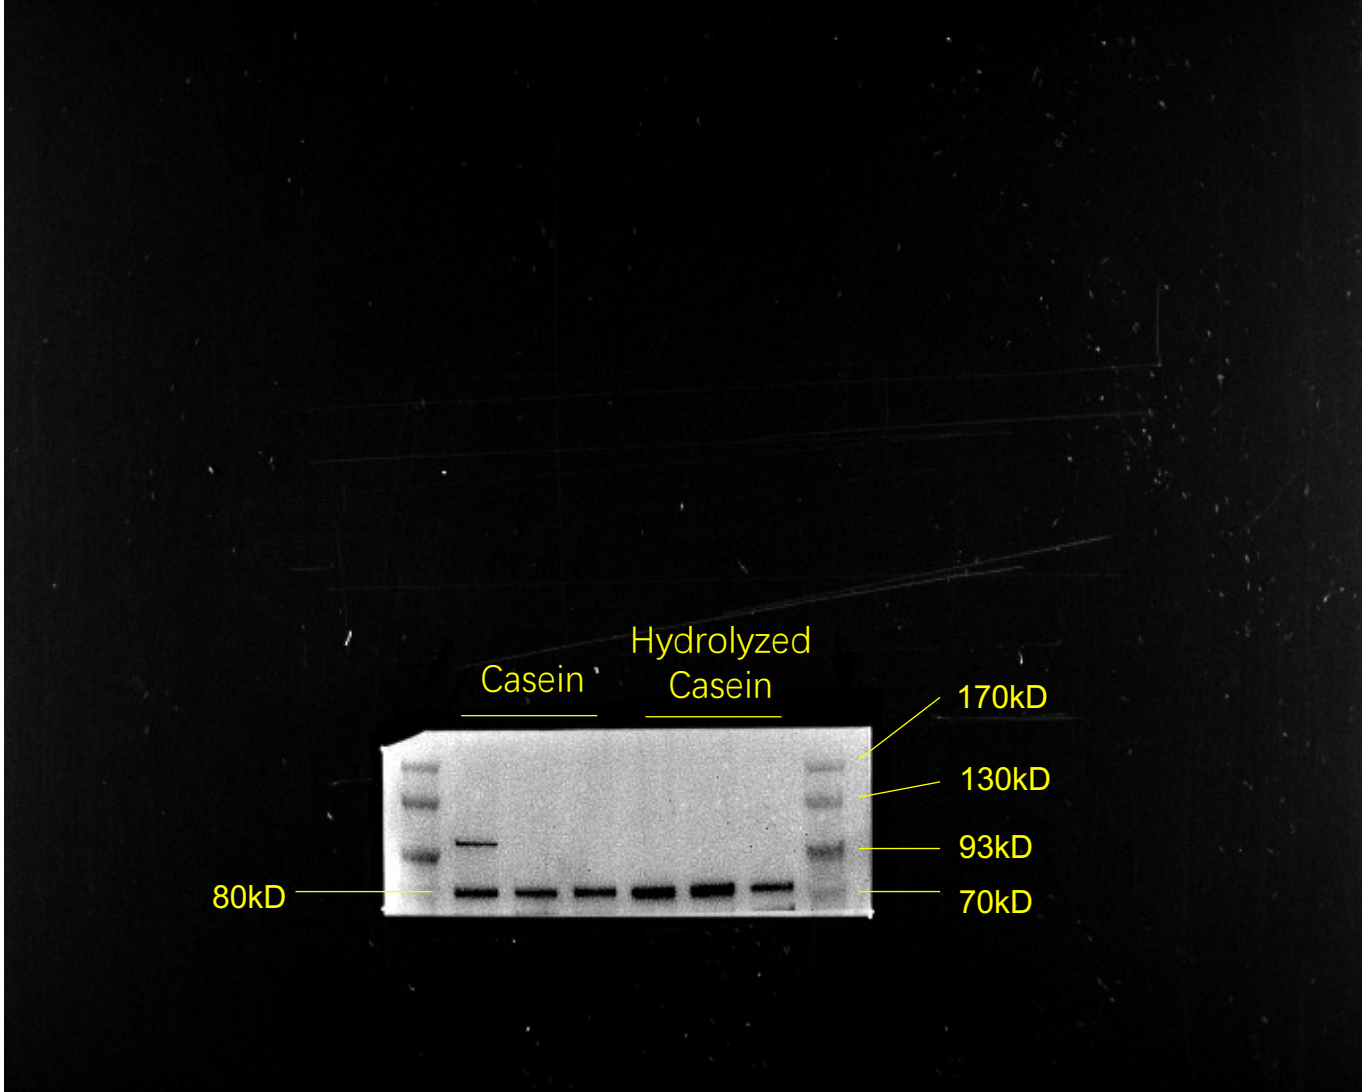

# ChgA Fig. 1I

Protein tech, 10529-1-AP

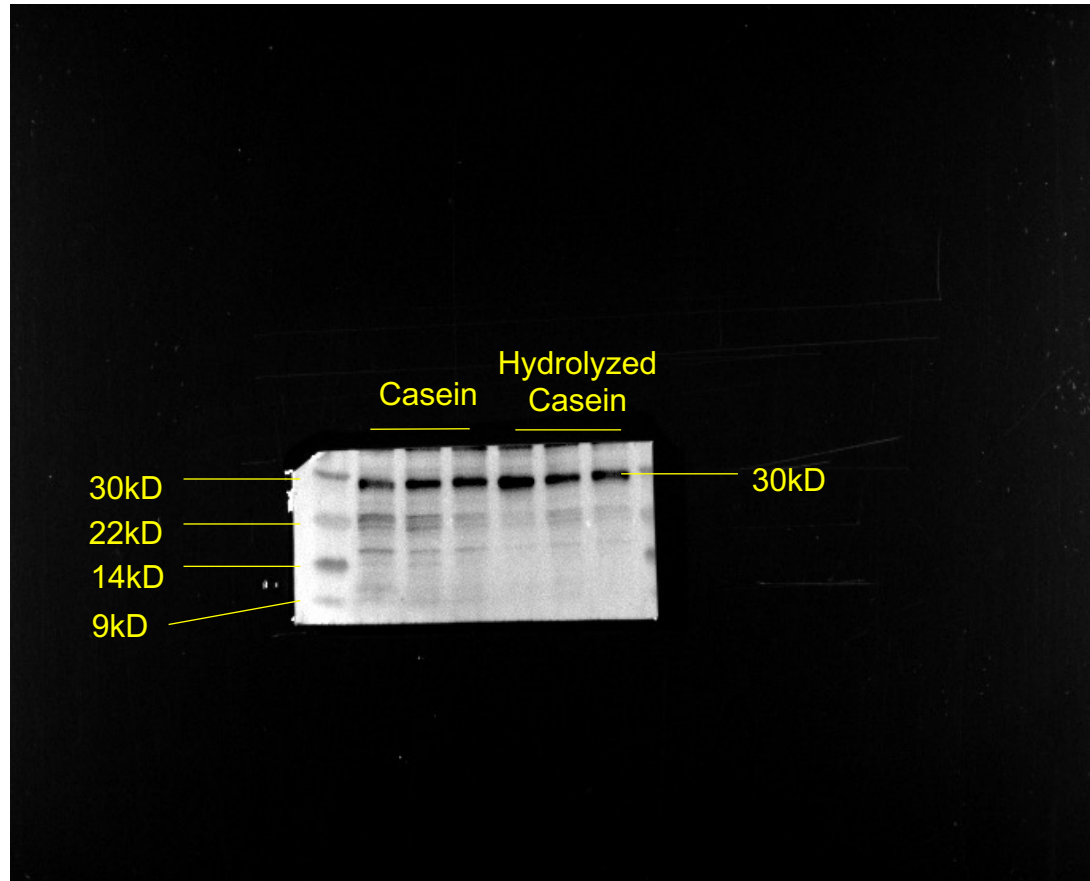

## NGN3 Fig. 1I

Abclonal, A2772

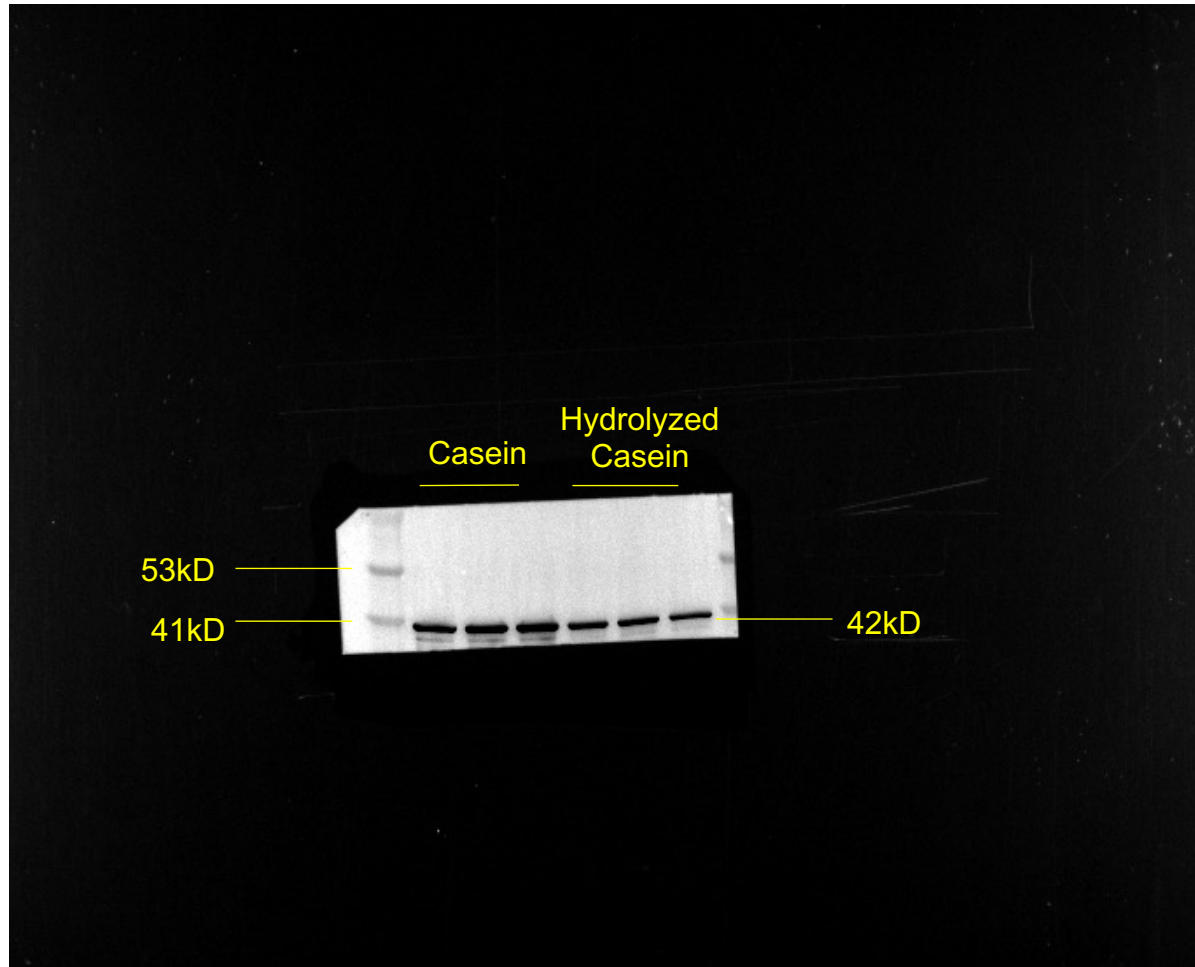

## $\beta$ -actin Fig. 1I

Abclonal, AC026

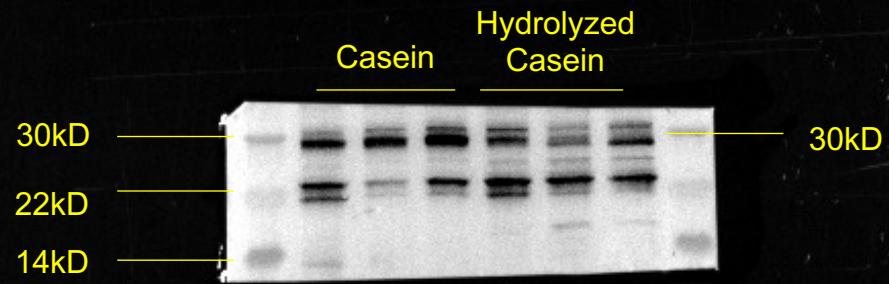

## NGN3 Fig. 2I

Abclonal, A2772

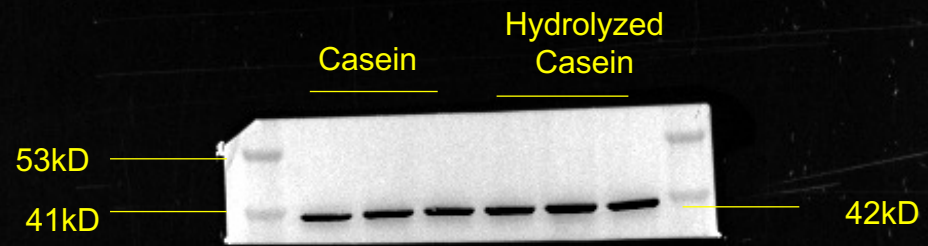

## $\beta$ -actin Fig. 2I

Abclonal, AC026

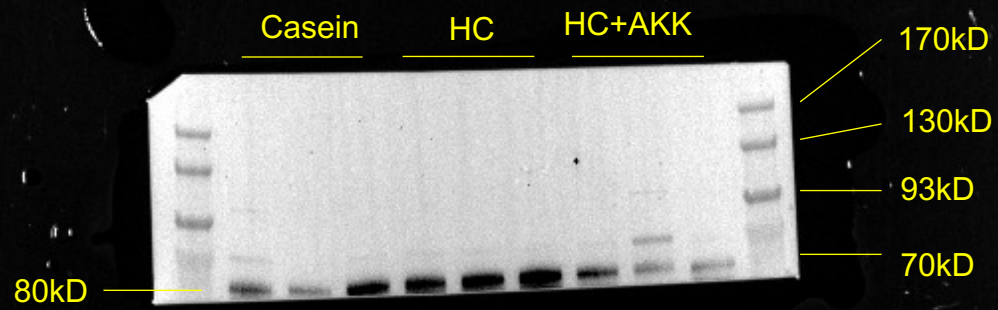

## ChgA Fig. 4J

Protein tech, 10529-1-AP

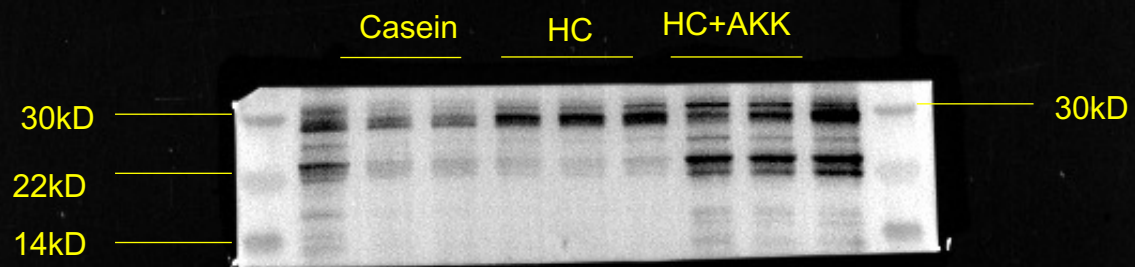

## NGN3 Fig. 4J

Abclonal, A2772



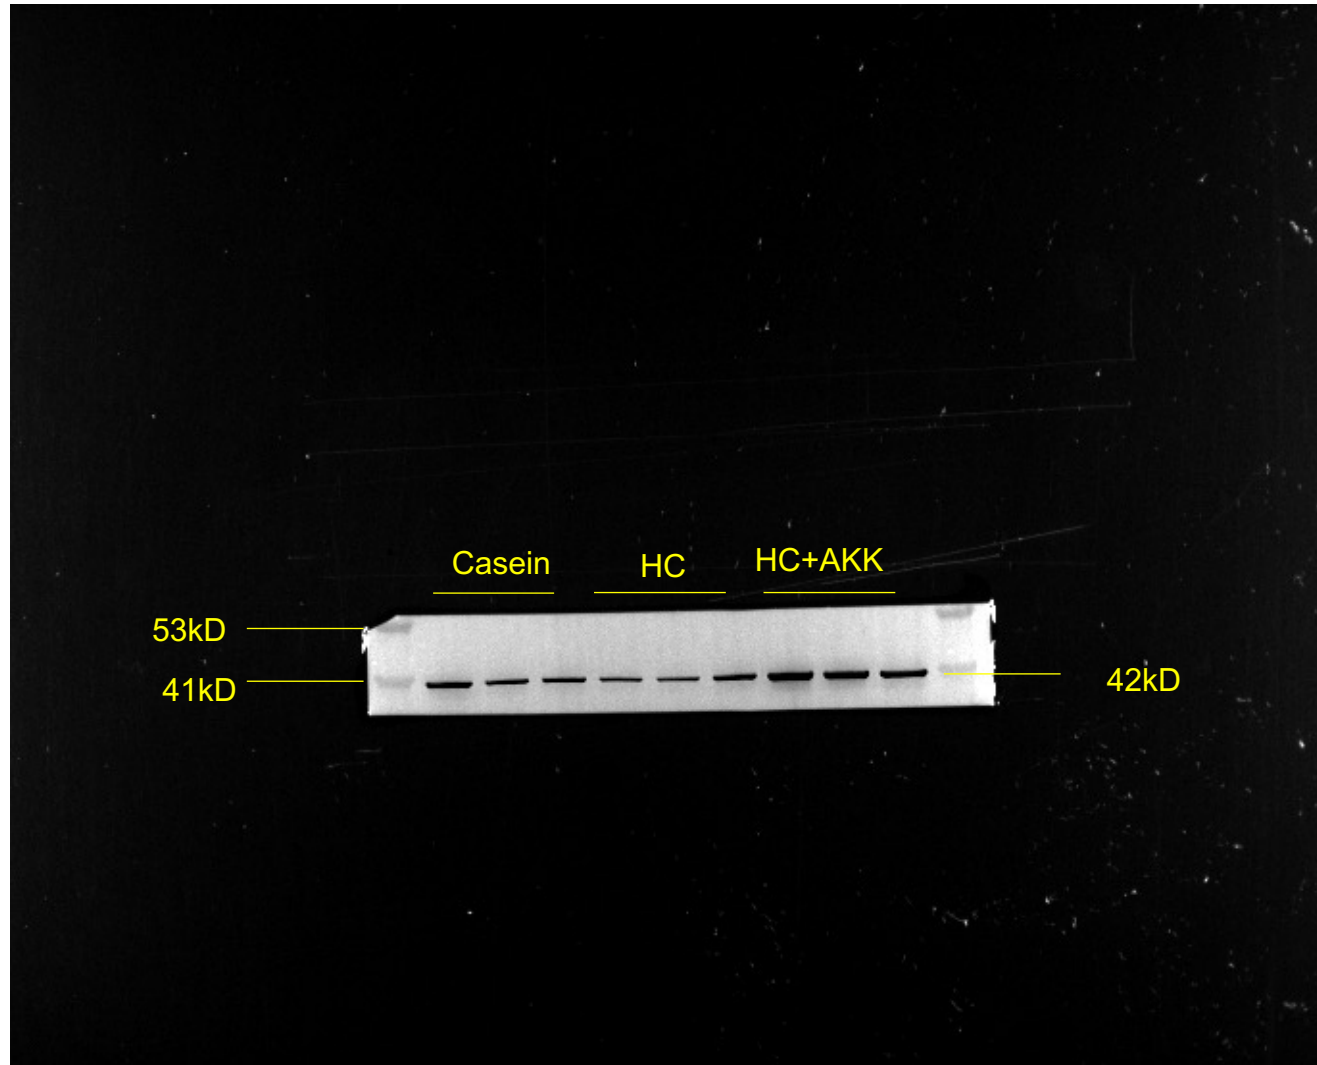

## $\beta$ -actin Fig. 4J

Abclonal, AC026

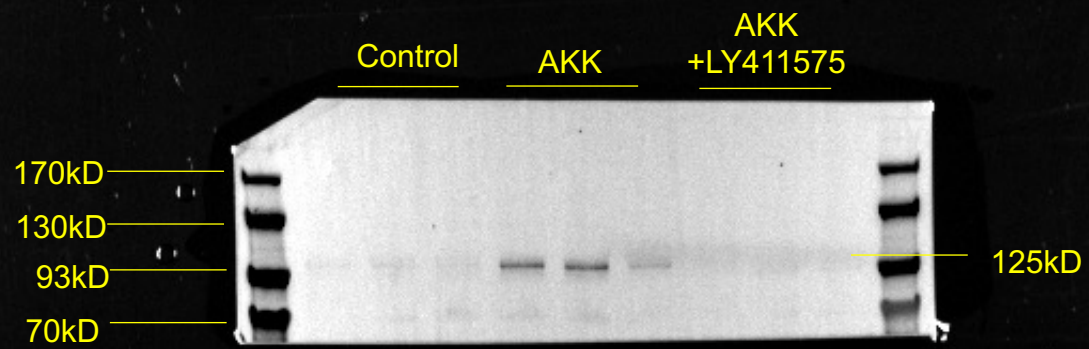

**Notch1 Fig. 5F**  
Abcam, ab52627

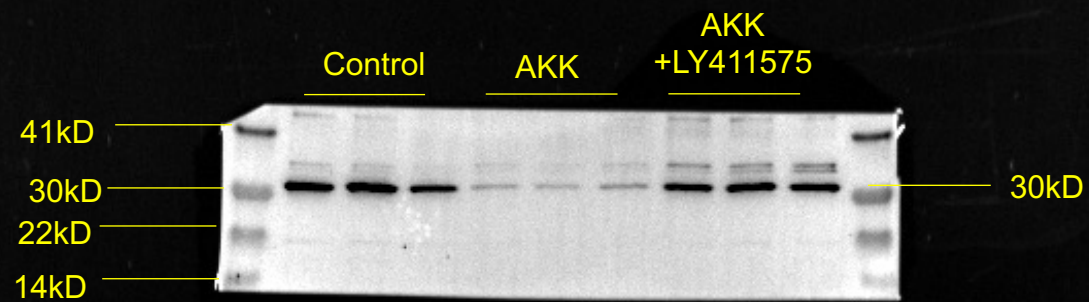

## NGN3 Fig. 5F

Abclonal, A2772

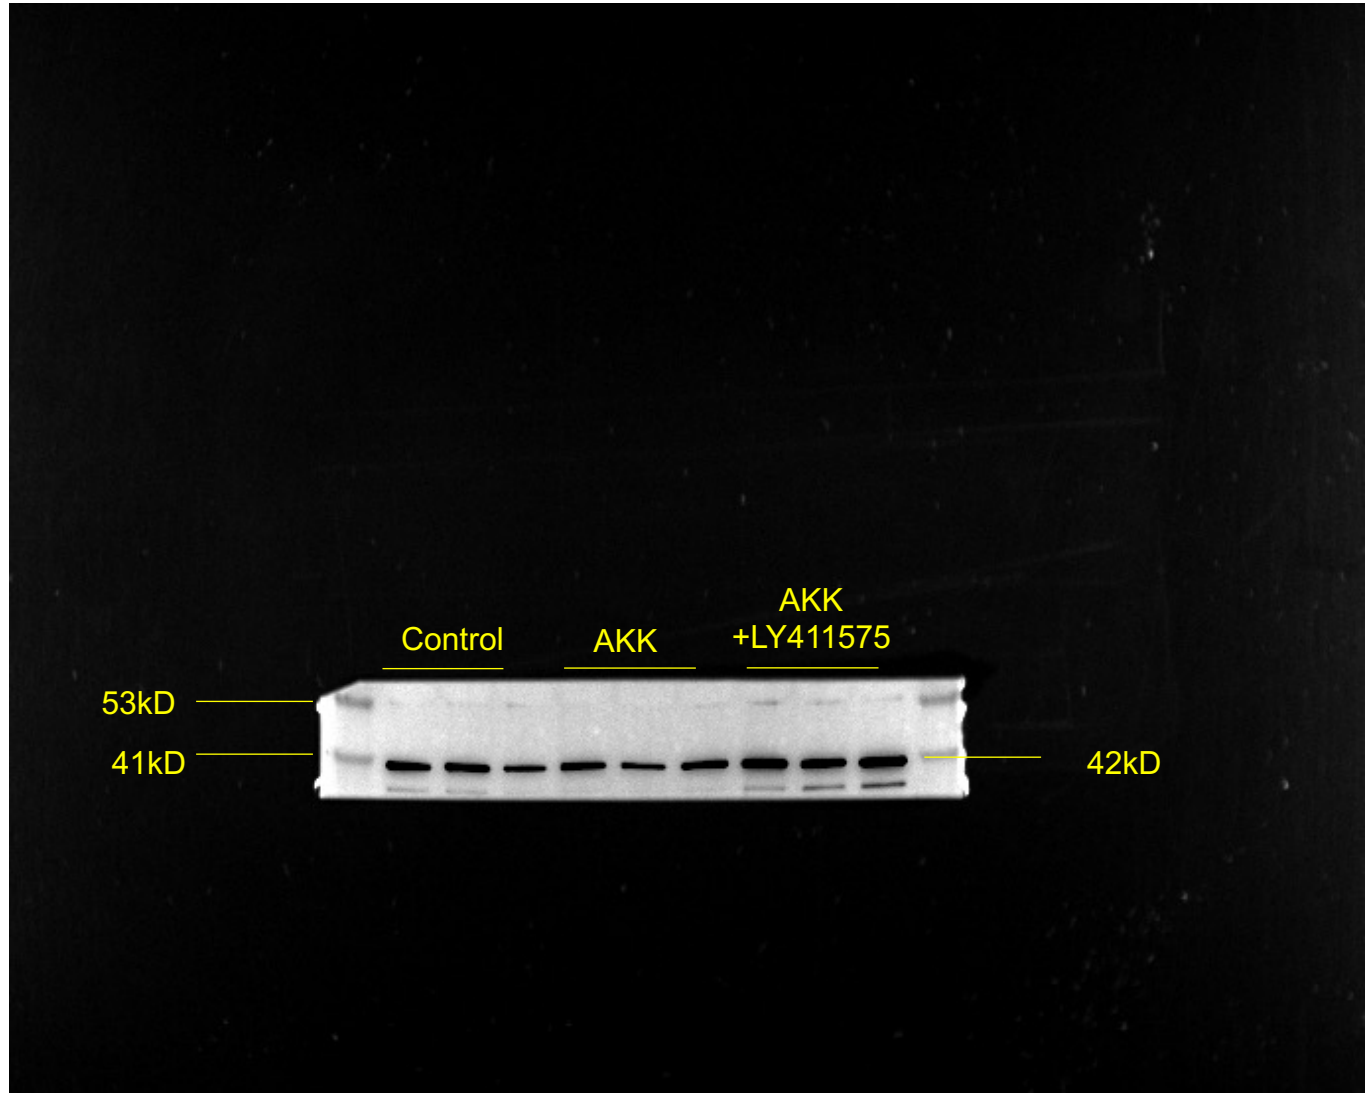

# $\beta$ -actin Fig. 5F

Abclonal, AC026
