# Supplementary figures and images for: A hydrolyzed casein diet promotes Ngn3 controlling enteroendocrine cell differentiation to increase gastrointestinal motility in mice
Source: Royal Society of Chemistry journal article supplement (doi:10.1039/d3fo04152b), 2023-12-28

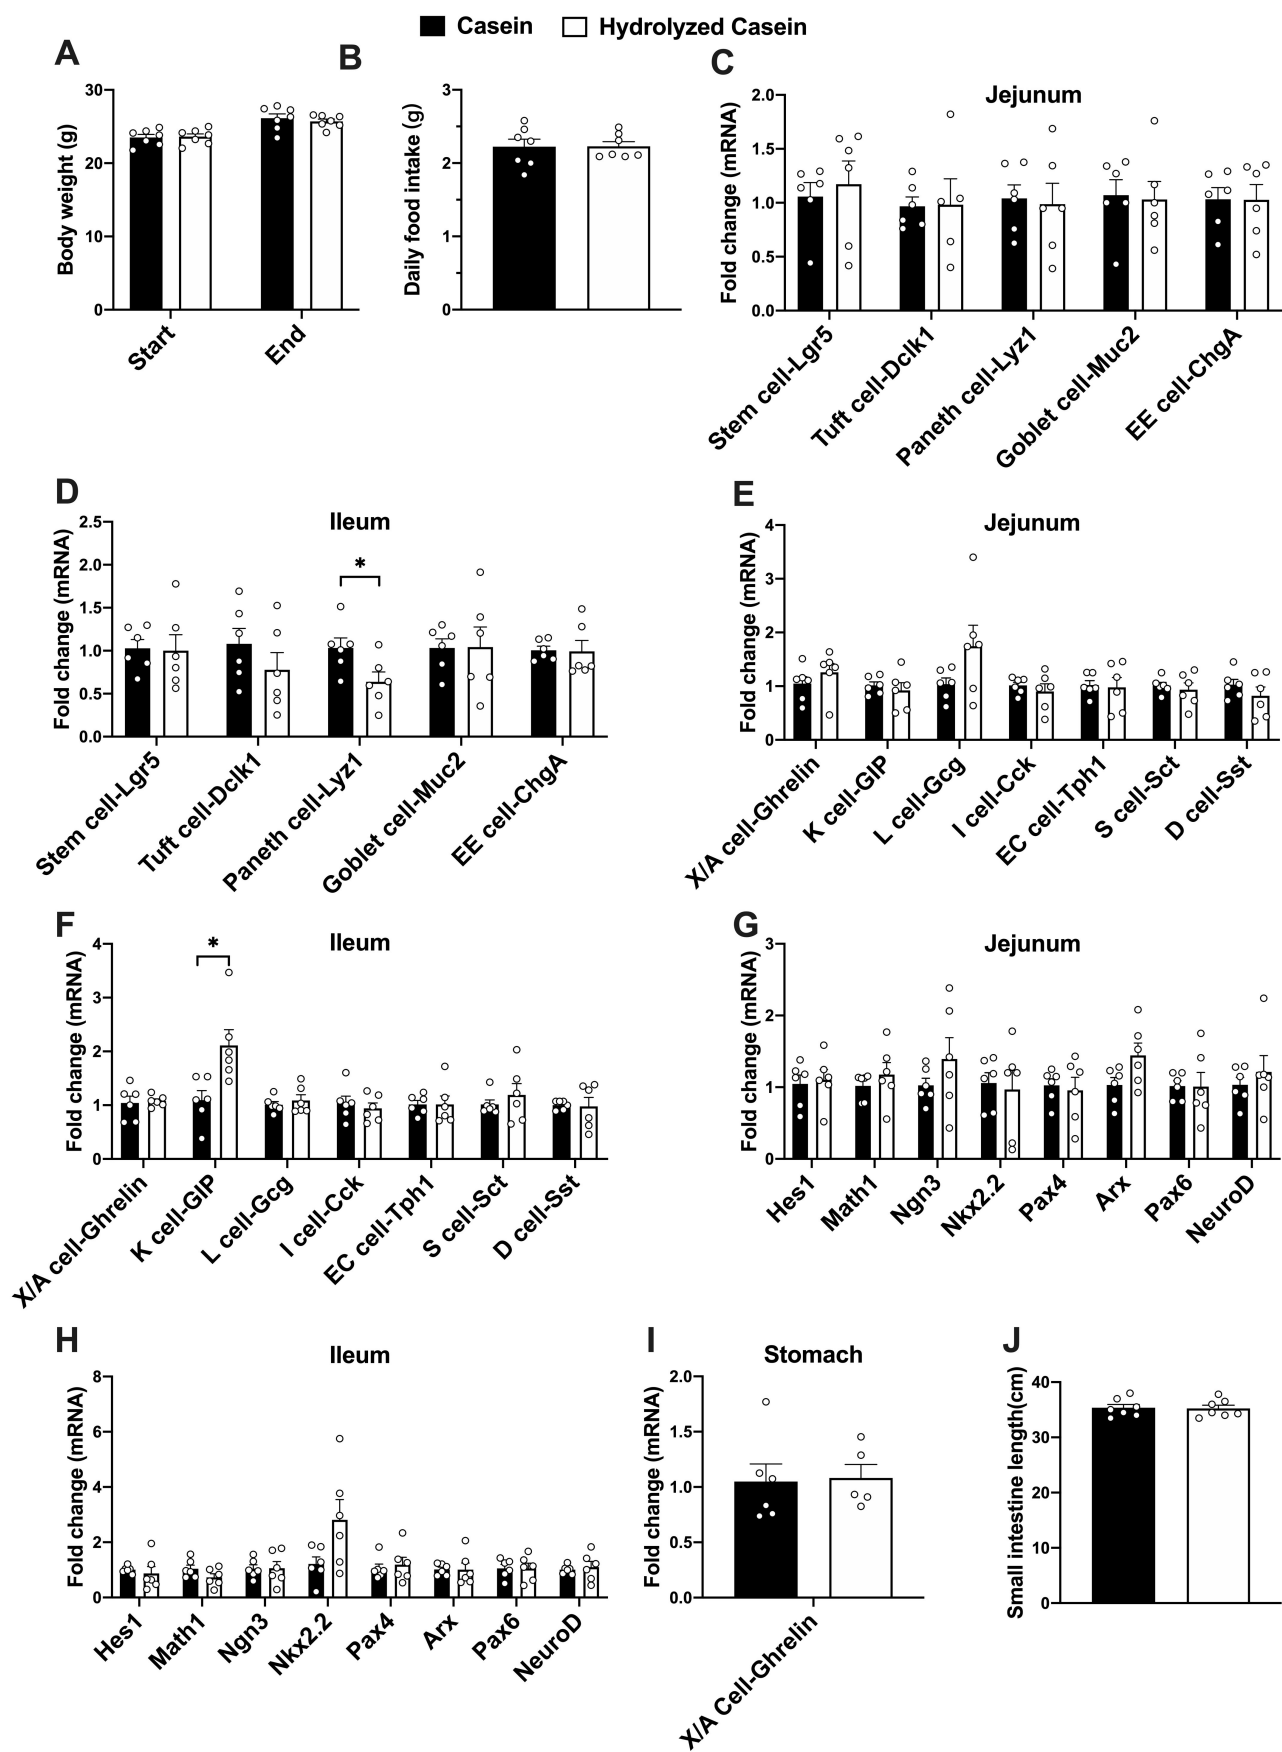

Supplement: d3fo04152b2.pdf [file d3fo04152b2.pdf]

■ Casein □ Hydrolyzed Casein

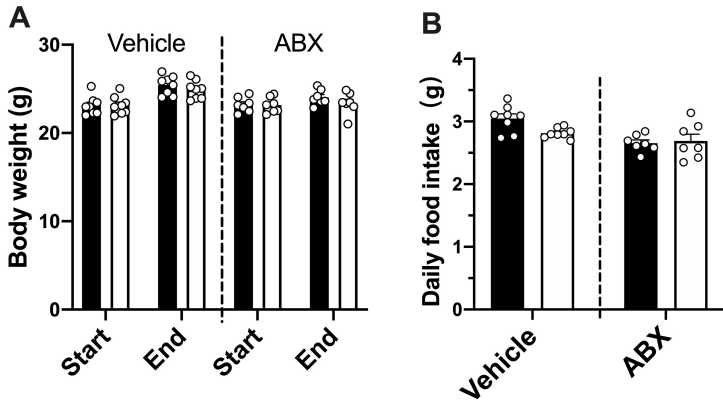

Supplement: d3fo04152b3.pdf [file d3fo04152b3.pdf]

**A** Venn diagram of Casein\_vs\_Hydrolyzed Casein

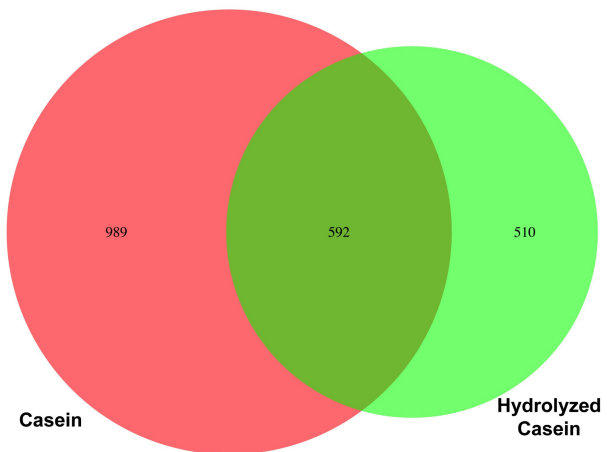

**B** Principal Component Analysis (P=0.025)

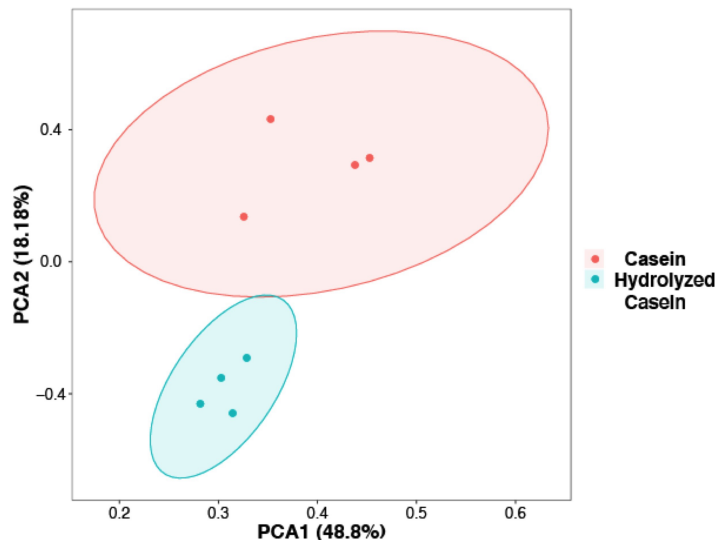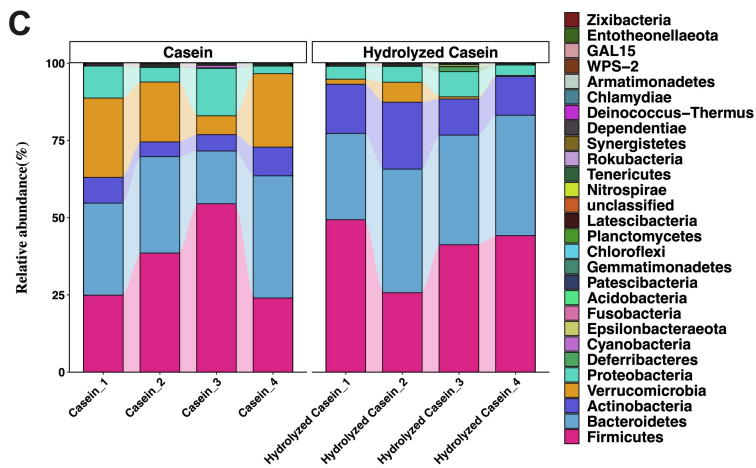

Supplement: d3fo04152b4.pdf [file d3fo04152b4.pdf]

■ Casein □ Hydrolyzed Casein

A

D:  $P = 0.444$  A:  $P < 0.001$  DxA:  $P = 0.005$

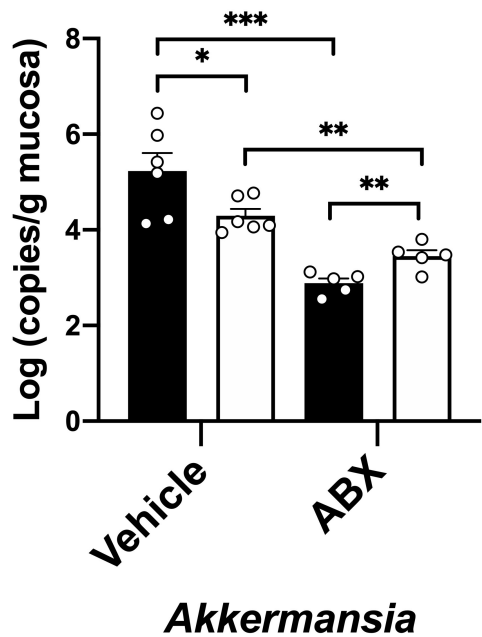

B

D:  $P = 0.067$  A: / DxA: /

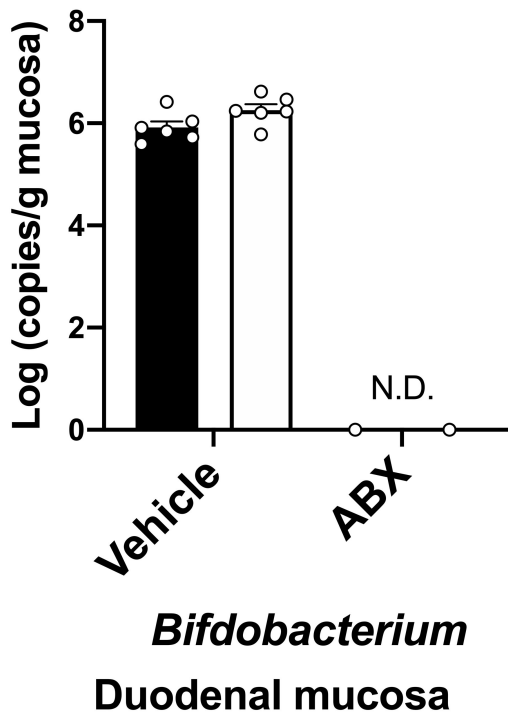

C

D:  $P = 0.307$  A:  $P < 0.001$  DxA:  $P = 0.186$

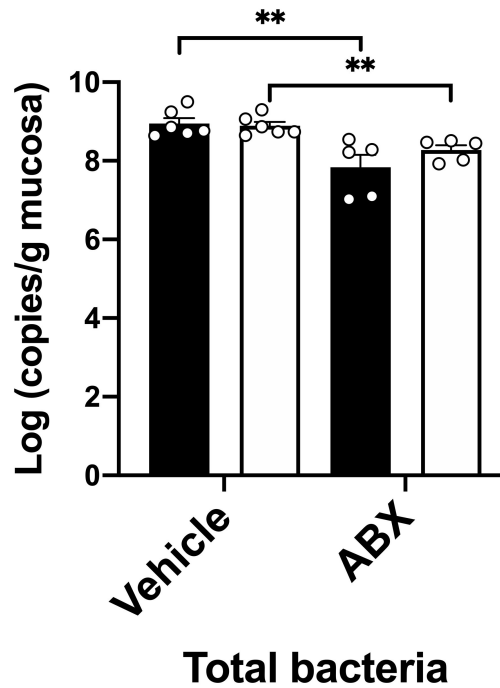

Supplement: d3fo04152b5.pdf [file d3fo04152b5.pdf]

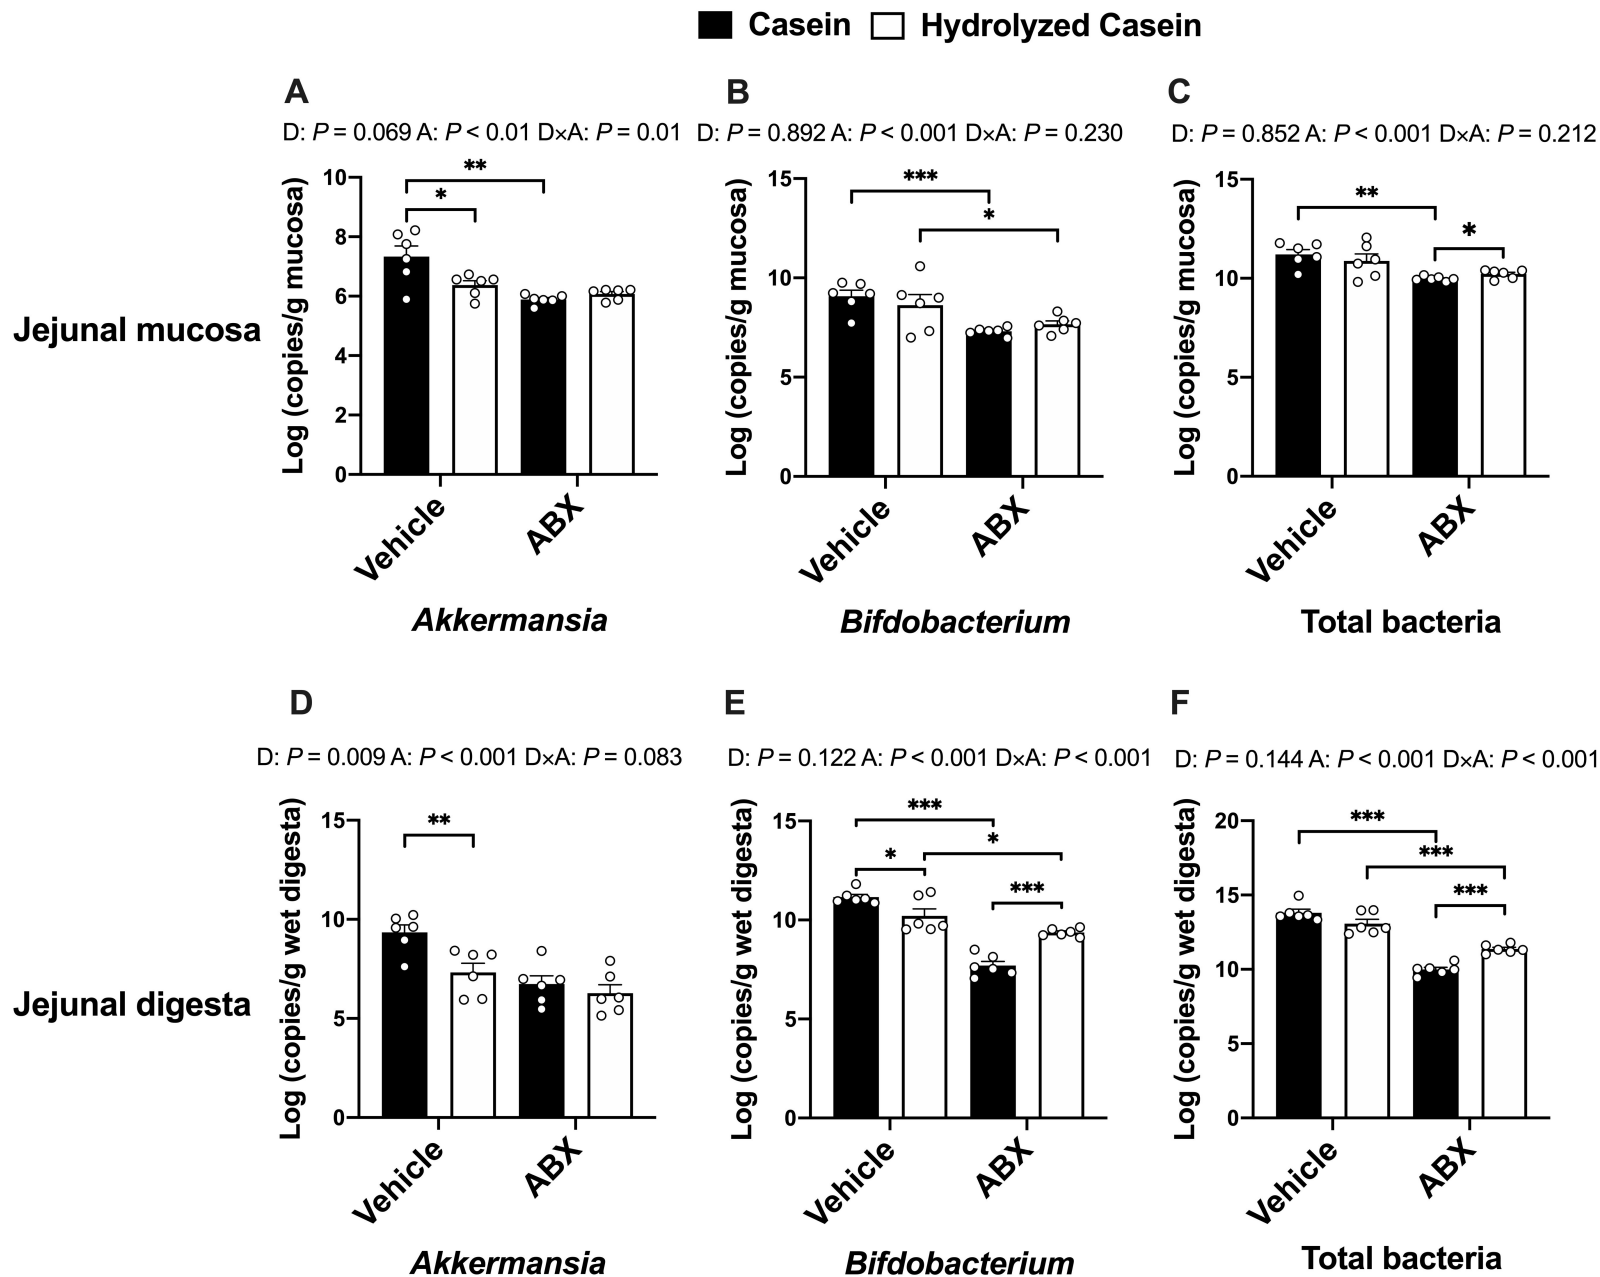

Supplement: d3fo04152b6.pdf [file d3fo04152b6.pdf]

■ Casein □ Hydrolyzed Casein

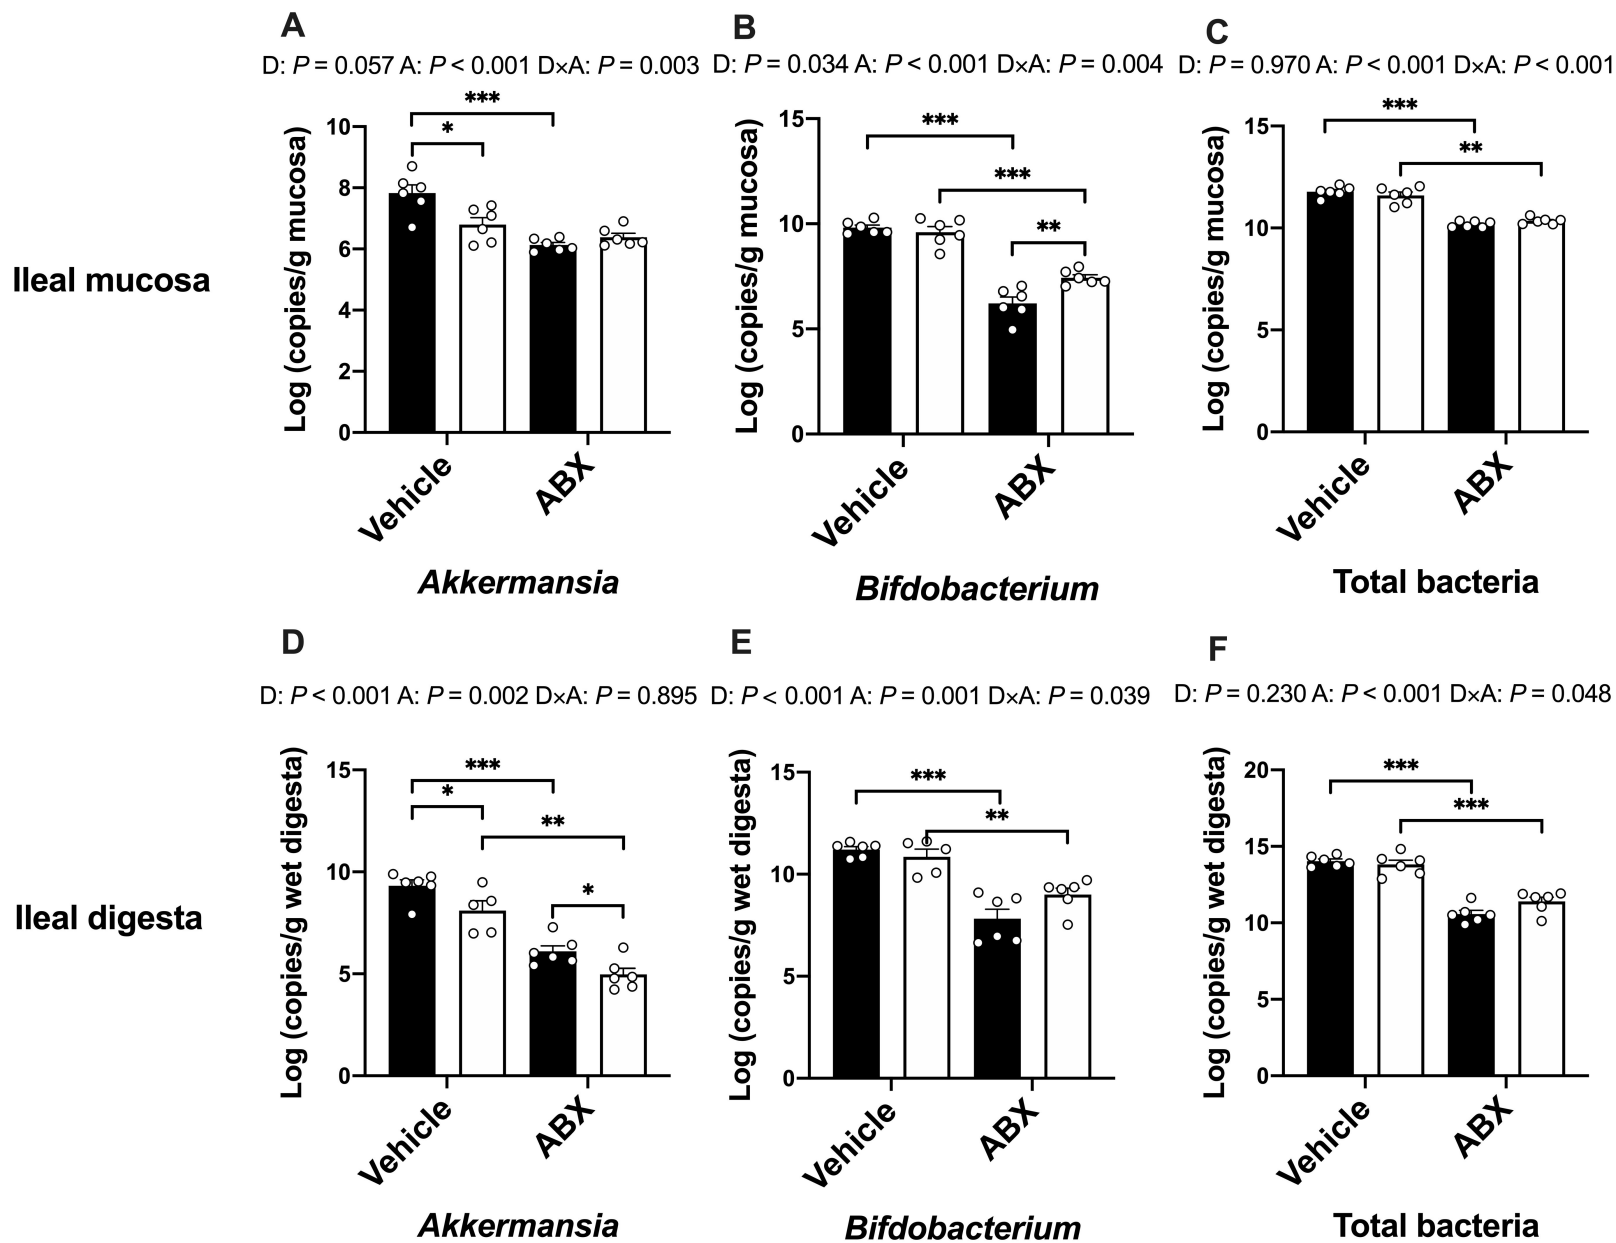

Supplement: d3fo04152b7.pdf [file d3fo04152b7.pdf]

■ Casein □ Hydrolyzed Casein ■ Hydrolyzed Casein + Akk

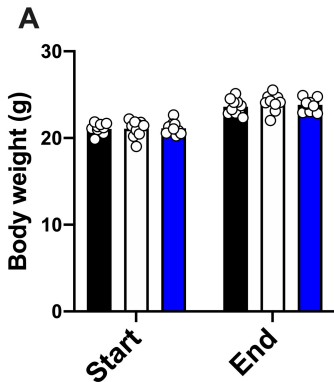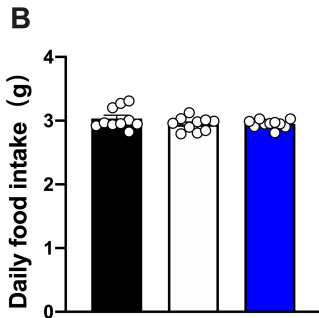

Supplement: d3fo04152b8.pdf [file d3fo04152b8.pdf]
